# Supplementary material for: Association between INHA gene polymorphisms and litter size in Hainan black goats
Source: PeerJ journal article supplement (doi:10.7717/peerj.15381), 2023-05-09
Supplement: FileS1.pdf [file FileS1.pdf]

## Supplementary Material

Supplementary Figure S1

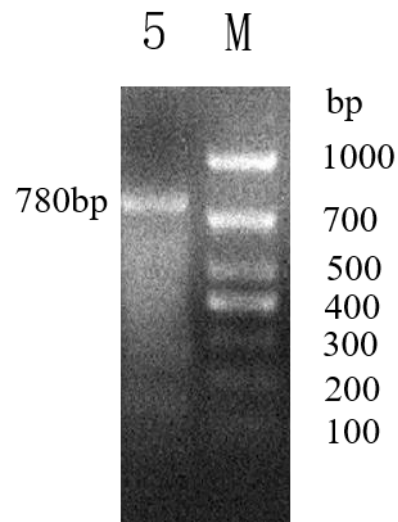

Supplementary Figure S1. The electrophoresis result of PCR amplified by primer *INHA-5*. The primer *INHA-5* was used to amplify 6 SNPs in exon 2 of the *INHA* gene.
